# Supplementary material for: CyTargetLinker: A Cytoscape App to Integrate Regulatory Interactions in Network Analysis
Source: PLOS journal article supplement (doi:10.1371/journal.pone.0082160), 2013-12-05

## Supporting Information: S4

### Case study 3: Enrichment of a human pathway from WikiPathways with miRNAs, TFs and drugs targeting the genes and gene products in the pathway

In use case 3 we extended the ErbB signaling pathway from WikiPathways (<http://www.wikipathways.org>) with microRNA-target, transcription factor-target and drug-target interactions.

CyTargetLinker created a meta-network containing the following interactions

- 138 drug-target
- 158 transcription factor-target
- 162 validated microRNA-target

The pathway was converted to a Cytoscape network with the GPML plugin for Cytoscape 2.8. In the new Cytoscape 3 version this plugin was renamed as *WikiPathways app* and was added to the Cytoscape app store recently.

The pathway diagram below shows the original ErbB Signaling Pathway on WikiPathways ([http://www.wikipathways.org/instance/WP673\\_r69914](http://www.wikipathways.org/instance/WP673_r69914)).

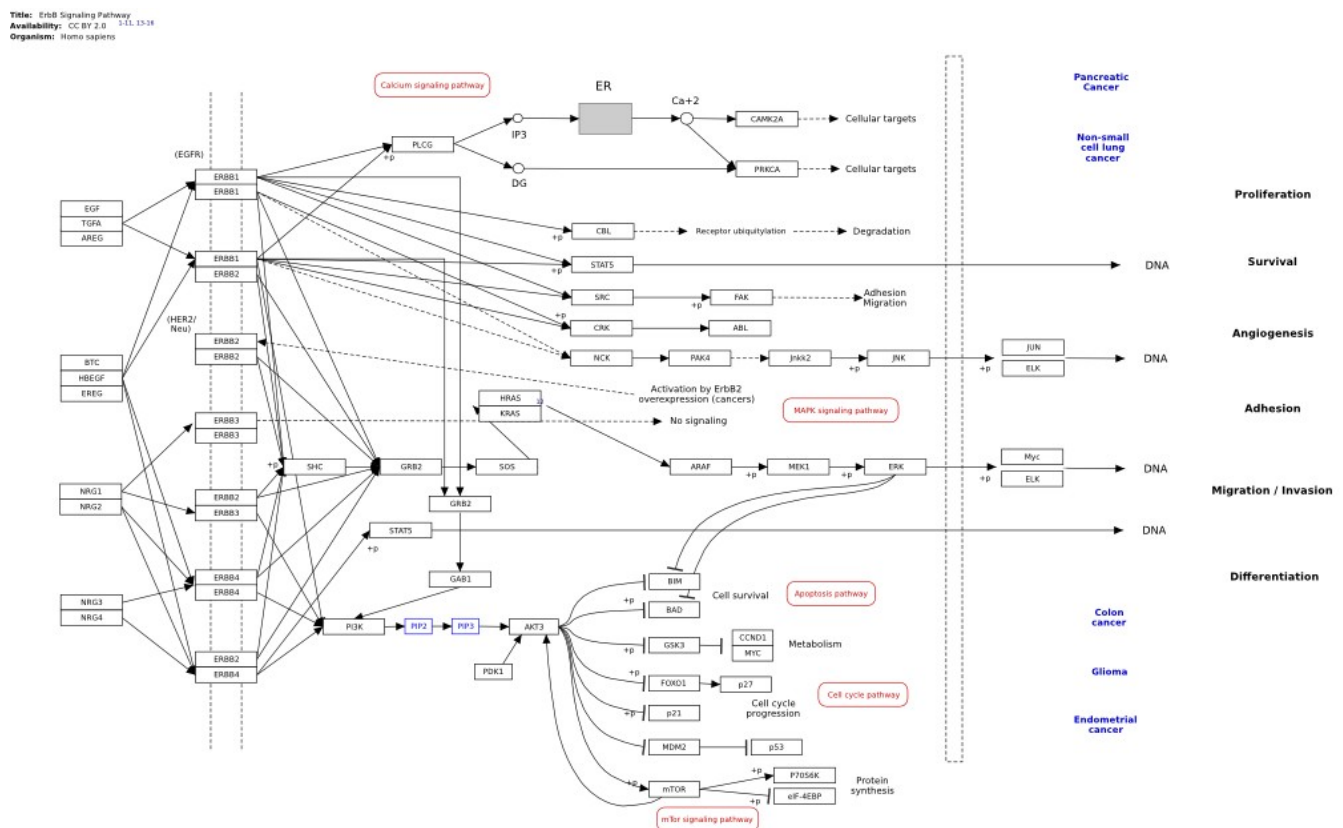

Supplement: S4 (10.1371/journal.pone.0082160.s004) [file journal.pone.0082160.s004]
